# Supplementary material
Source: publisher site journal article supplement (https://www.degruyterbrill.com/publication/isbn/9783050082134/downloadAsset/9783050082134_Buchinformation.pdf)
Supplement: Supplementary file 1 [file 9783050082134_Buchinformation.pdf]

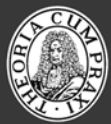

# Akademie Verlag

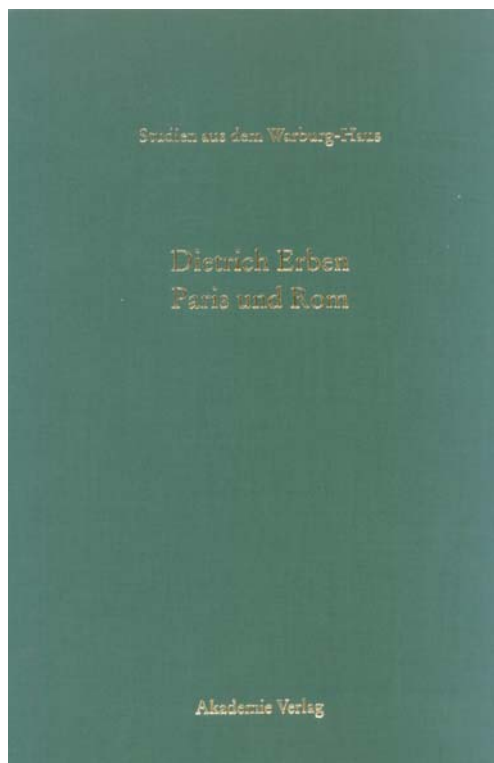

Dietrich Erben

## Paris und Rom

*Die staatlich gelenkten Kunstbeziehungen  
unter Ludwig XIV.*

**Studien aus dem Warburg-Haus, Band 9**

2004. XX, 409 Seiten, 118 Abb. 170 x 240 mm

Festeinband, € 69,80

ISBN 978-3-05-003851-3

Die Frage nach den historischen Bedingungen und Möglichkeiten für den Anspruch Frankreichs auf die kulturelle Hegemonie innerhalb der europäischen Staatenwelt steht im Mittelpunkt des Buches. Ein solcher Anspruch gewann unter der Regierung Ludwigs XIV. (1661-1715) in Kunst und Architektur maßgeblich am Vorbild Roms Gestalt. Mit dieser Orientierung ist auch die Grundabsicht der französischen Kulturpolitik in dieser Epoche benannt. Sie zielte auf die Ablösung der politischen und geistlichen Titel, die Rom zu vergeben hatte, und auf den Erwerb des Status einer Universalmonarchie. Diese Zielsetzung wurde für eine kunstpolitische Programmatik bestimmend, die bis in die Renaissance zurückreicht, doch unter Ludwig XIV. eine militant gesteigerte Dynamik entfaltete. Eine umfassende Rekonstruktion der Kunstbeziehungen zwischen Paris und Rom im historischen und ideengeschichtlichen Kontext belegt nicht nur deren Dauer und Intensität. Sie erschließt mit den stilistischen Prägungen auch den grundsätzlichen Programmcharakter der Hofkunst Ludwigs XIV.
